# Supplementary material for: N-cadherin signaling via Trio assembles adherens junctions to restrict endothelial permeability
Source: PubMed Central journal article supplement — J Cell Biol. 2019 Jan 7;218(1):299–316. doi: 10.1083/jcb.201802076 (PMC6314553; doi:10.1083/jcb.201802076), 2019-01-07
Supplement: JCB_201802076_sm.pdf [file JCB_201802076_sm.pdf]

Supplemental material

Kruse et al., <https://doi.org/10.1083/jcb.201802076>

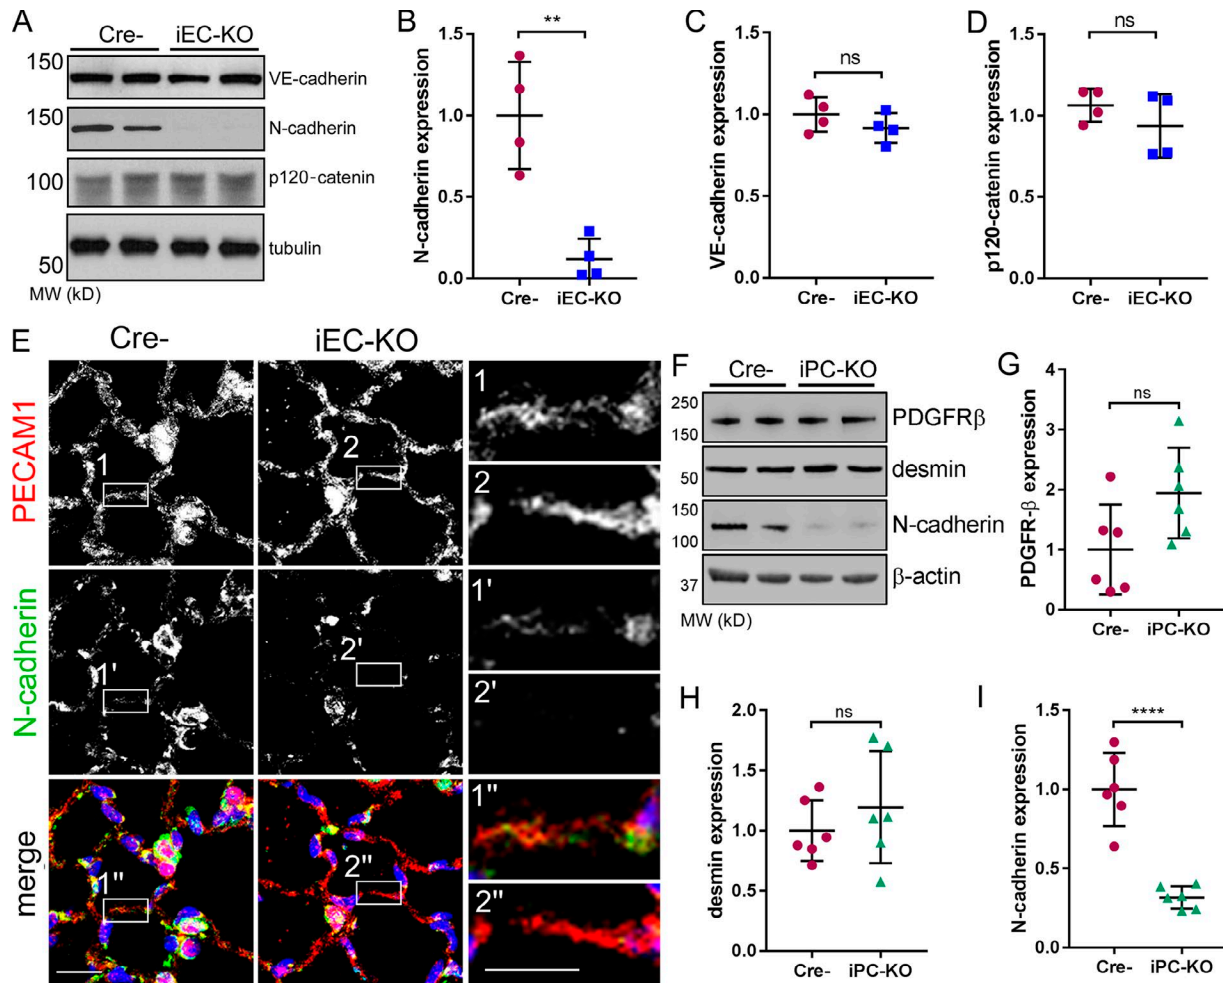

Figure S1. **Genetic deletion of N-cadherin in ECs or pericytes induces vascular leakage.** Related to Fig. 1. **(A)** Western blot analysis of endothelial specific fractions collected from lungs of *Cre*<sup>-</sup> and *Cdh2* iEC-KO littermates for N-cadherin, VE-cadherin, p120-catenin, and tubulin. **(B-D)** Quantification of N-cadherin (B), VE-cadherin (C), and p120-catenin (D) expression in ECs normalized to *Cre*<sup>-</sup> mice using data in A; *n* = 4 mice per group. \*\*, *P* < 0.01, a two-tailed, unpaired *t* test was used to test significance. **(E)** Representative confocal images of mouse lung sections from *Cre*<sup>-</sup> and *Cdh2* iEC-KO mice stained for N-cadherin (green on merged image), PECAM1 (red), and nuclei (DAPI, blue); enlarged insets from each panel are indicated by 1, 1', or 1'' for control and 2, 2', and 2'' for iEC-KO mice. Bars, 10 μm; insets, 5 μm. Note reduced expression of N-cadherin in PECAM1-positive cells of *Cdh2* iEC-KO mice. **(F)** Western blot analysis of pericytes isolated from *Cre*<sup>-</sup> and *Cdh2* iPC-KO littermates for N-cadherin, PDGFRβ, desmin, and β-actin. **(G-I)** Quantification of expression levels of PDGFRβ (G), desmin (H), and N-cadherin (I) in brain pericytes normalized to *Cre*<sup>-</sup> mice using data in F; *n* = 6 samples from three mice per group. \*\*\*\*, *P* < 0.0001, a two-tailed, unpaired *t* test. (B-D and G-I) Data are shown as mean ± SD.

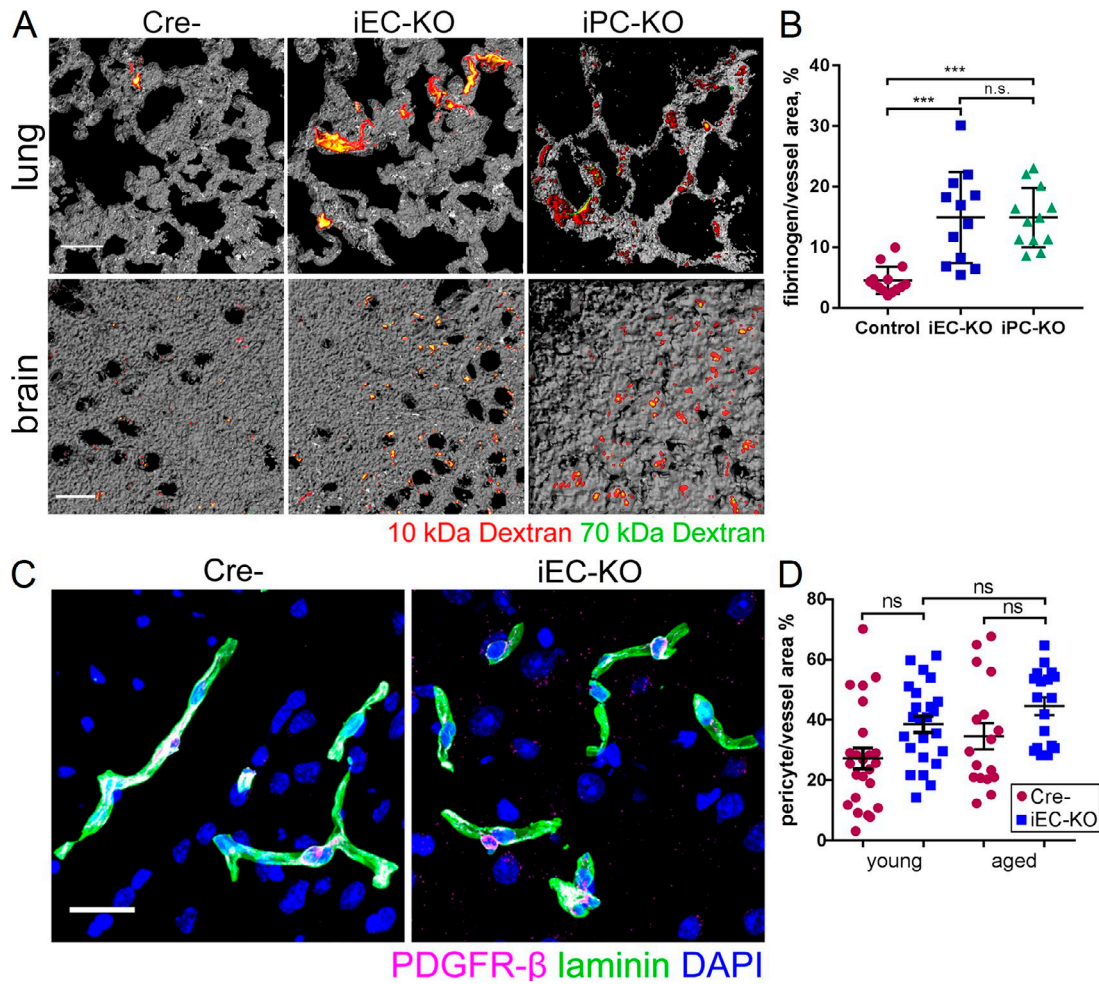

Figure S2. **Genetic deletion of N-cadherin in ECs or pericytes induces vascular leakage.** Related to Fig. 1. **(A)** 3D reconstructed images of mouse lung and brain tissue from Cre<sup>-</sup> control, *Cdh2* iEC-KO, and *Cdh2* iPC-KO mice after injection of 10-kD dextran (red) and 70-kD dextran (green); Bar, 10  $\mu$ m. Tissue architecture from autofluorescence is shown in gray. **(B)** Measurement of lung transvascular leakage of fibrinogen in Cre<sup>-</sup> control, *Cdh2* iEC-KO, and *Cdh2* iPC-KO mice. The leakage is expressed as a percent of fibrinogen-positive vessel area.  $n = 12$ – $16$  fields from three to five mice per group. \*\*\*,  $P < 0.001$ , ANOVA with Tukey's post hoc test. Data are shown as mean  $\pm$  SD. **(C)** Representative confocal images of mouse brain sections from Cre<sup>-</sup> and *Cdh2* iEC-KO mice stained for PDGFR- $\beta$  (green), laminin (magenta), and nuclei (DAPI, blue). Bar, 10  $\mu$ m. **(D)** Quantification of pericyte coverage of brain microvessels expressed as pericyte area per vessel area (PDGFR- $\beta$ /laminin) in young adult (12–18-wk-old) and aged (36–40-wk-old) mice.  $n = 24$  fields from three to four mice per group. ns, ANOVA with Tukey's post hoc test. Data are shown as mean  $\pm$  SEM.

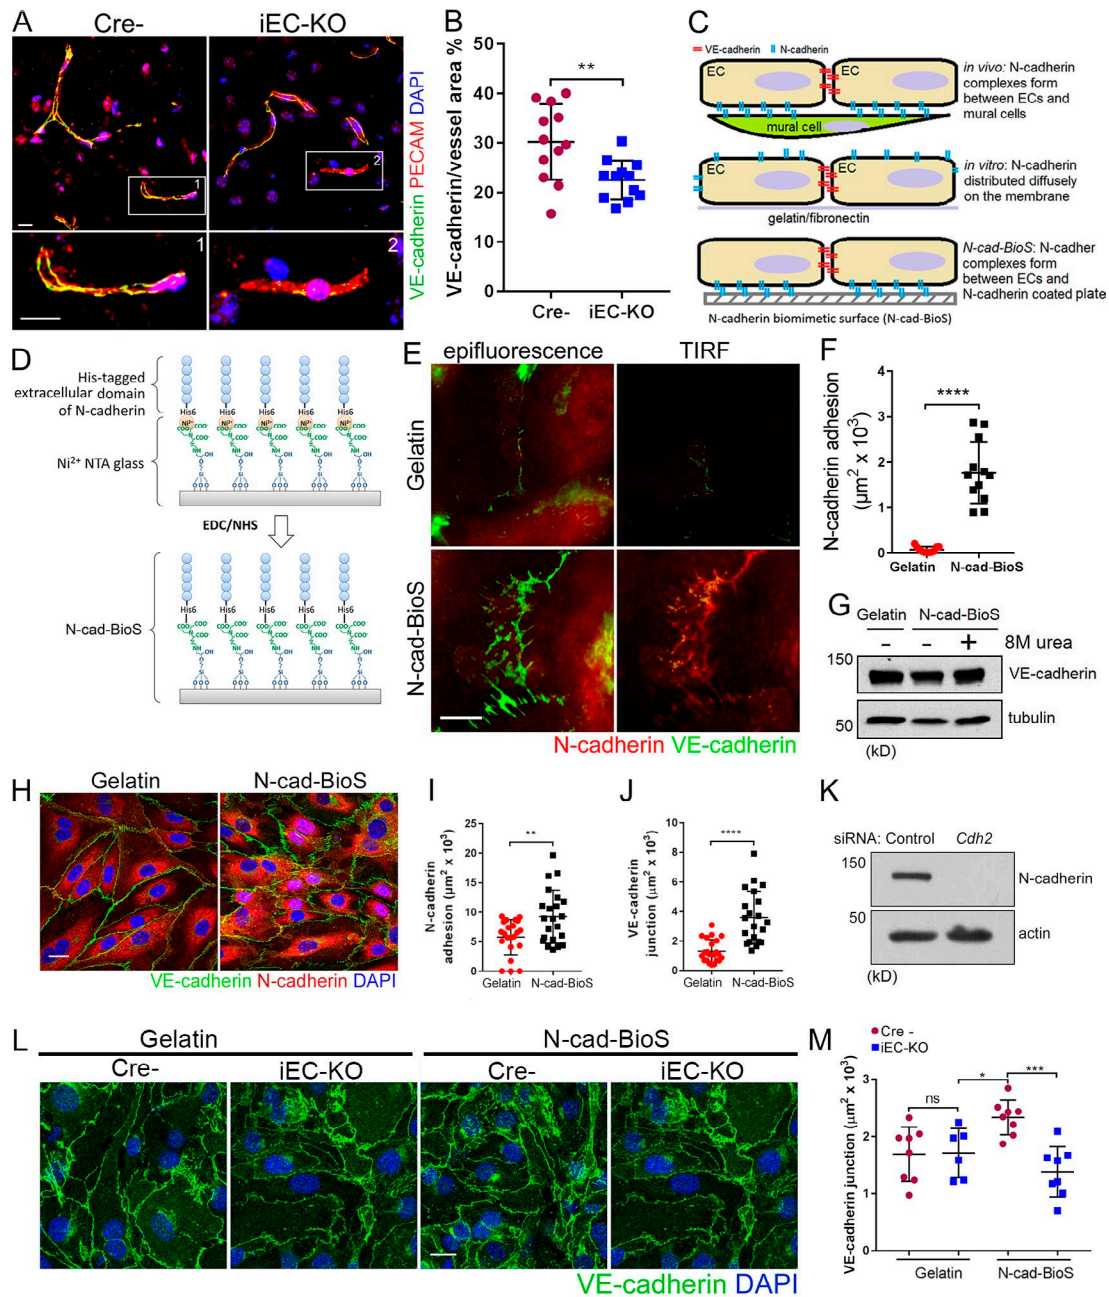

**Figure S3. Genetic deletion of N-cadherin disassembles VE-cadherin adhesion.** Related to Fig. 2. **(A)** Representative confocal images of mouse brain sections from Cre<sup>-</sup> and *Cdh2* iEC-KO mice stained for VE-cadherin (green), PECAM1 (red), and nuclei (DAPI, blue); enlarged insets for merged images are shown below and labeled as indicated. Bar, 10  $\mu$ m; insets, 5  $\mu$ m. VE-cadherin at PECAM1-positive junctions is reduced in *Cdh2* iEC-KO mice as compared with controls. **(B)** VE-cadherin adhesion area normalized to PECAM1 area from images in A.  $n = 12$  images from three mice per group. \*\*,  $P < 0.01$ , a two-tailed, unpaired  $t$  test was used to test significance. **(C)** Model depicting N-cadherin localization in ECs *in vivo*, *in vitro*, and on biomimetic surface. Gelatin versus N-cad-BioS is shown for a cell culture model. **(D)** Schematic representation of steps used to manufacture N-cad-BioS. The His-tagged extracellular domain of N-cadherin is covalently linked to Ni-NTA glass to allow similar orientation of all molecules. See Materials and methods. **(E)** Immunofluorescent staining of HPAEC monolayers for VE- (green) and N-cadherin (red) proteins. Side-by-side comparison of epifluorescent and TIRF images demonstrates clustering of N-cadherin at abuminal side of the cells in HPAECs grown on N-cad-BioS but not on gelatin. Bar, 10  $\mu$ m. Note VE-cadherin is excluded from N-cadherin adhesion. **(F)** Quantification of N-cadherin adhesion area from images in (E).  $n = 12$ –15 images per group from three independent experiments. \*\*\*\*,  $P < 0.0001$ , a two-tailed, unpaired  $t$  test. **(G)** Western blot analysis of VE-cadherin and  $\beta$ -tubulin (loading control) in HPAECs grown on gelatin, N-cad-BioS, or N-cad-BioS denatured with 8 M urea. Note there is no change in VE-cadherin level. **(H)** Confocal images of VE-cadherin (green), N-cadherin (red), and nuclei (DAPI, blue) in human lung microvascular endothelial cells grown on either gelatin or N-cad-BioS. Bar, 10  $\mu$ m. **(I and J)** Quantification of N-cadherin (I) and VE-cadherin (J) adhesion area from cells in H.  $n = 22$  images per group from three independent experiments. \*\*,  $P < 0.01$ ; \*\*\*\*,  $P < 0.0001$ , a two-tailed, unpaired  $t$  test. **(K)** Western blot analysis of N-cadherin expression in HPAECs treated with *Cdh2* or control (scrambled) siRNA;  $\beta$ -actin is used as a loading control. **(L)** Confocal images of VE-cadherin (green) and nuclei (DAPI, blue) in murine ECs isolated from lungs of Cre<sup>-</sup> or *Cdh2* iEC-KO mice and grown on either gelatin or N-cad-BioS. Bar, 10  $\mu$ m. **(M)** Quantification of VE-cadherin adhesion area from images in K.  $n = 6$ –8 images per group. \*,  $P < 0.05$ ; \*\*\*,  $P < 0.001$ , ANOVA with Tukey's post hoc test. (B, F, I, J, and M) Data are shown as mean  $\pm$  SD.

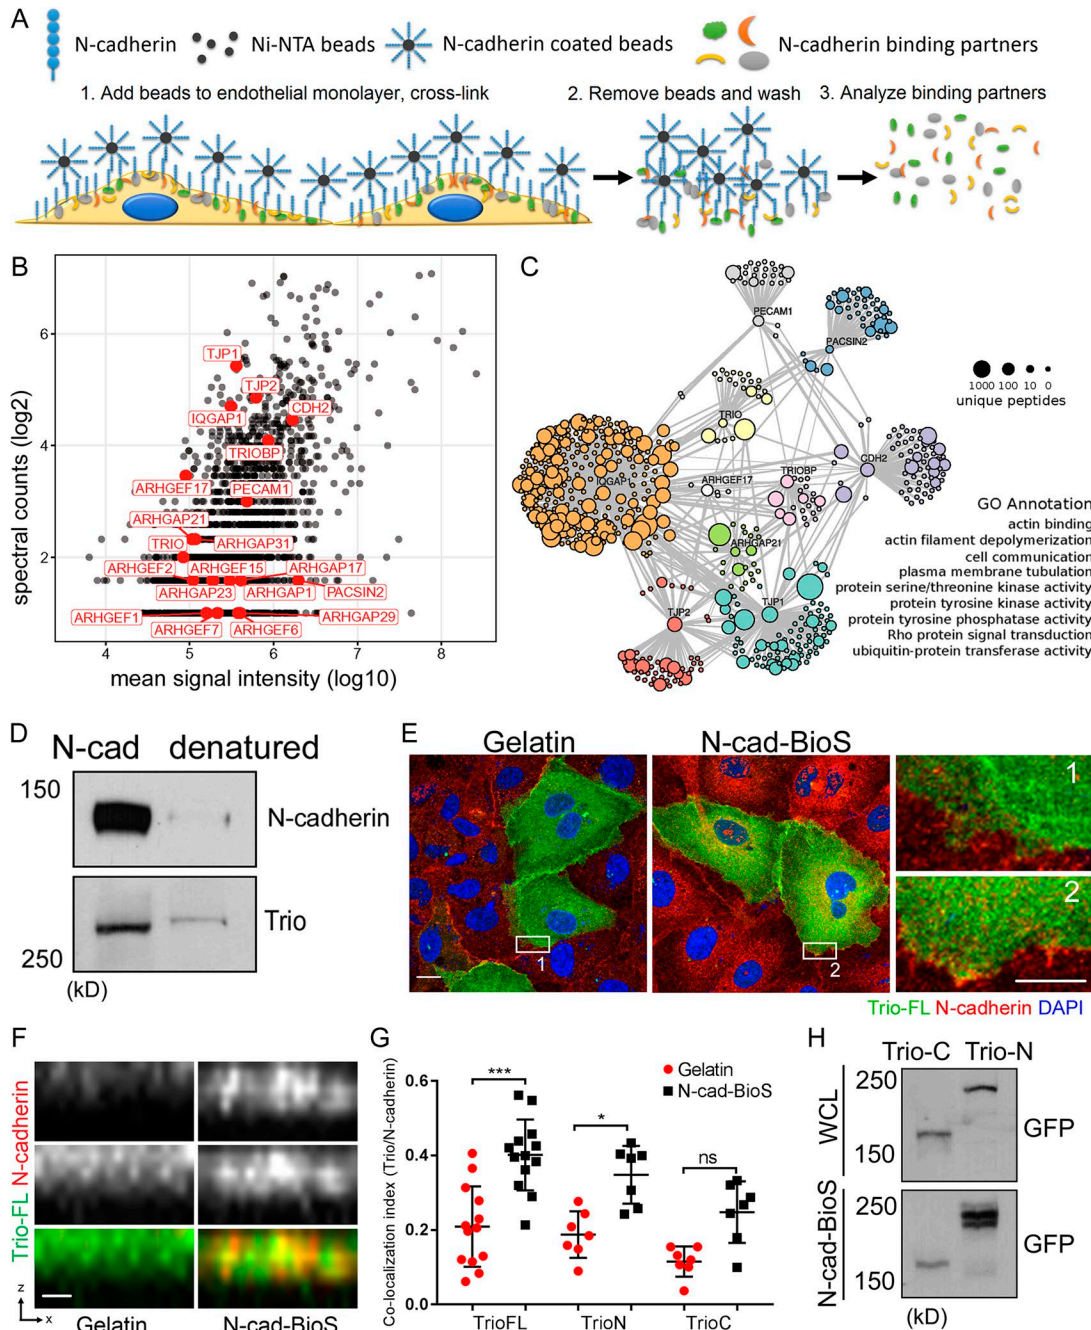

Figure S4. **N-cadherin complexed with Trio signals assembly of VE-cadherin adhesion.** Related to Fig. 4. **(A)** Schematic representation of the method used for isolation of N-cadherin adhesion complex. The His-tagged extracellular domain of N-cadherin is covalently linked to Ni<sup>2+</sup>-NTA beads. N-cad-BioS beads are added to the endothelial monolayer and allowed to form N-cadherin adhesion complex, which was cross-linked to the beads with the thiol-reversible cross-linker, DTSP. Beads were washed to remove contaminating proteins and cross-link was reversed using DTT. Proteins were then separated by SDS-PAGE and submitted for mass spectrometry analysis. **(B and C)** Proteins of N-cadherin adhesion complex detected by mass spectrometry. (B) Scatter plot of mean intensity versus spectral counts. (C) Interaction network for proteins of interest highlighted in B with clusters established based on individual protein interaction profiles; see Materials and methods. GO associations were based on a hypergeometric test ( $P < 1e^{-12}$ ). **(D)** Western blot analysis of isolated N-cadherin adhesion complex for endogenous N-cadherin and Trio proteins. HPAECs were incubated with either N-cad-BioS beads or denatured N-cad-BioS beads for 1 h; N-cadherin complex was collected and processed as described in Methods. **(E and F)** Confocal lateral (E, insets) and axial (F) images of exogenously expressed FL GFP-Trio. Cells were stained for N-cadherin (red) and nuclei (DAPI; blue). Enlarged insets are shown on right; bar, 10  $\mu$ m for lateral; insets, 5  $\mu$ m; 1  $\mu$ m for axial. **(G)** Colocalization coefficient of N-cadherin clusters with GFP-Trio-FL (shown in E), GFP-Trio-N (N terminus), and GFP-Trio-C (C terminus). The colocalization index was calculated as the sum of positive pixels for both N-cadherin and Trio divided by the total number of N-cadherin-positive pixels.  $n = 7-13$  cells per condition from three independent experiments. \*,  $P < 0.05$ ; \*\*\*\*,  $P < 0.0001$ , a two-tailed, unpaired  $t$  test. Data are shown as mean  $\pm$  SD. **(H)** Western blot analysis of GFP-Trio deletion mutants expressed in ECs; whole cell lysates (WCLs) and isolated N-cadherin complexes (N-cad-BioS) indicate preferential recruitment of GFP-Trio-N to N-cadherin complexes.

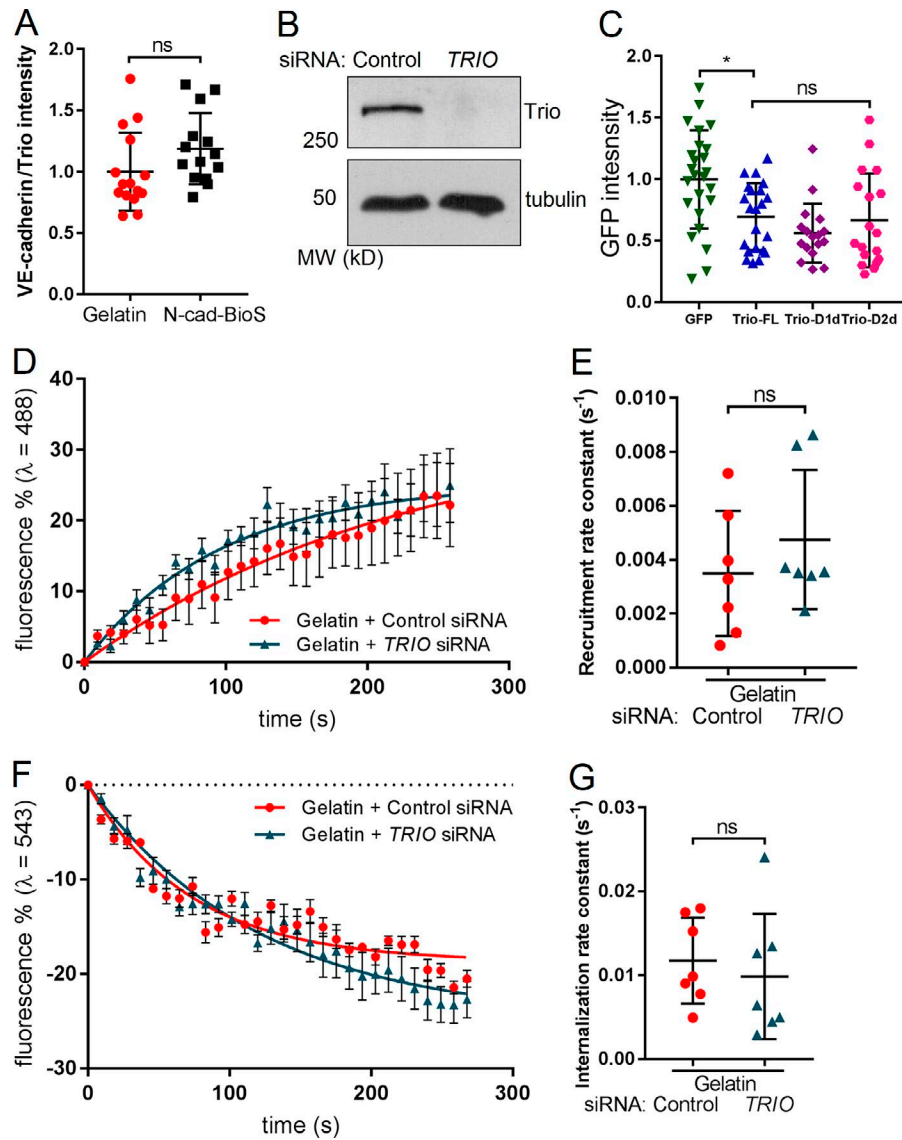

Figure S5. **N-cadherin complexed with Trio signals assembly of VE-cadherin adhesion.** Related to Fig. 4. **(A)** VE-cadherin fluorescent intensity normalized to Trio fluorescent intensity at AJs in cells expressing GFP-Trio-FL and stained with VE-cadherin. Accumulation of Trio at VE-cadherin junctions is not regulated by N-cadherin signaling.  $n = 15$  cells per condition from three independent experiments. ns, a two-tailed, unpaired  $t$  test. **(B)** Western blot analysis of Trio expression after treatment of HPAECs with control or *TRIO* siRNA.  $\beta$ -Tubulin was used as a loading control. **(C)** Normalized ratio of GFP fluorescent intensity from cells expressing GFP, GFP-Trio-FL, and GFP-Trio mutants from cells analyzed in Fig. 5 C. \*,  $P < 0.05$ , ANOVA with Tukey's post hoc test. **(D and E)** The rates of VE-cadherin recruitment to AJs (D) and the recruitment rate constants (E) in cells grown on gelatin after depletion of Trio or treatment with control siRNA;  $n = 7$  junctions per group from three independent experiments. ns, a two-tailed, unpaired  $t$  test. **(F and G)** Rates of VE-cadherin internalization from AJs (F) and internalization rate constants (G) in cells grown on gelatin after depletion of Trio or treatment with control siRNA;  $n = 7$  junctions per group from three independent experiments; ns, a two-tailed, unpaired  $t$  test. (A, C, E, and G) Data are shown as mean  $\pm$  SD. (D and F) Data are shown as mean  $\pm$  SEM.

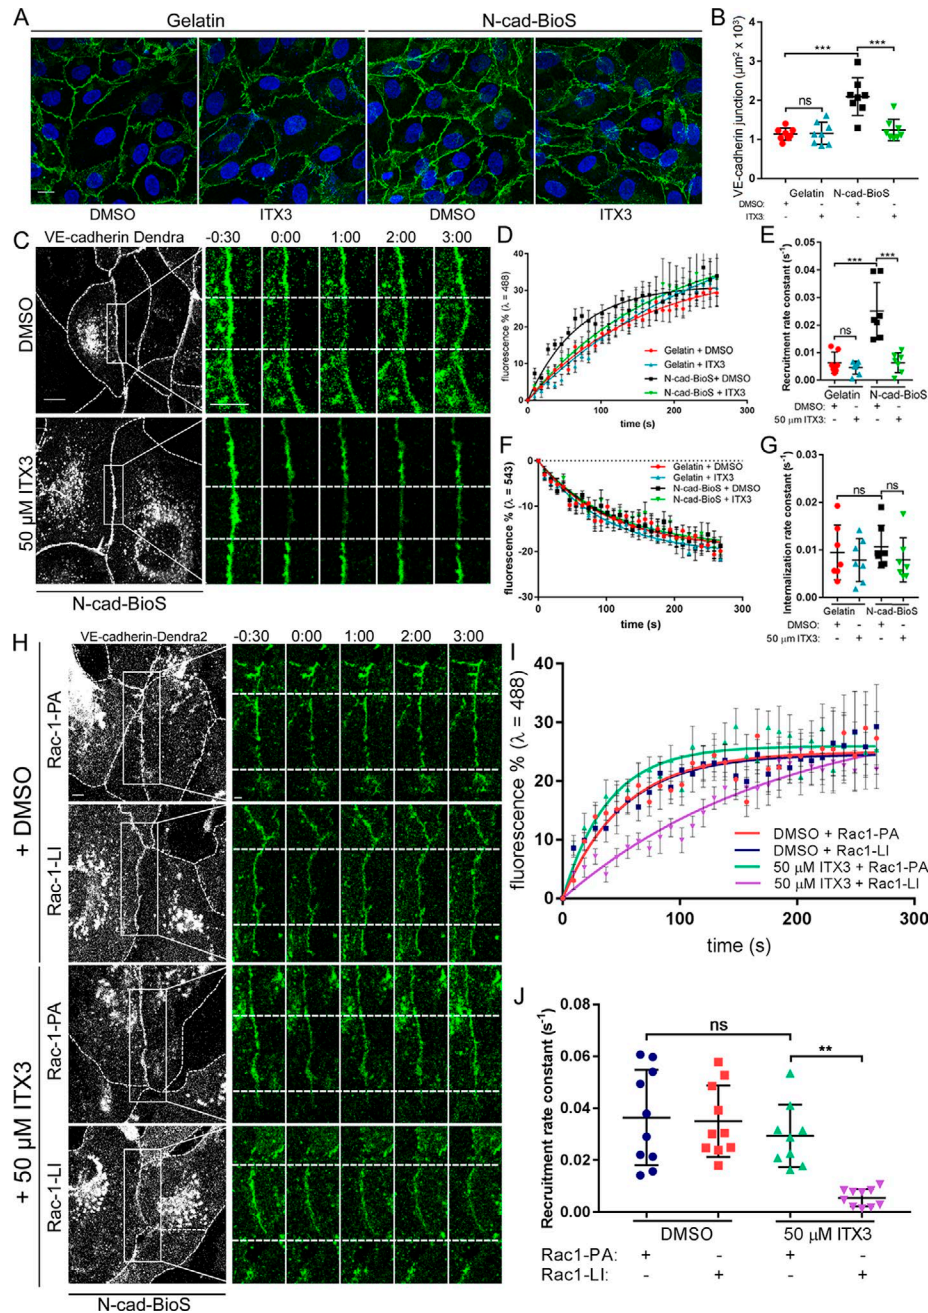

Figure S6. **Trio GEF1 activity is required for assembly of VE-cadherin junctions downstream of N-cadherin signaling.** Related to Figs. 5, 6, and 7. **(A)** Confocal images of HPAECs grown on either gelatin or N-cad-BioS and treated with vehicle (DMSO) or 50  $\mu\text{M}$  ITX3 to inhibit the interaction of Trio with Rac1. Cells were stained for VE-cadherin (green) and nuclei (DAPI, blue). Bar, 10  $\mu\text{m}$ . **(B)** Quantification of VE-cadherin junction area using images in A. Note inhibition of Trio GEF1 significantly reduced the density of VE-cadherin at AJs only in cells grown on N-cad-BioS.  $n = 8$  images per group from three independent experiments. **\*\*\***,  $P < 0.001$ , ANOVA with Tukey's post hoc test. **(C)** Time-lapse images of VE-cadherin–Dendra2 before and after photo-conversion at  $t = 0$  within the irradiation zone (indicated by area between dashed lines on insets) in HPAECs grown on N-cad-BioS after treatment with vehicle (DMSO) or 50  $\mu\text{M}$  ITX3. Dashed lines of grayscale images outline the cell borders. Bar, 5  $\mu\text{m}$ . **(D and E)** The rates of VE-cadherin recruitment to AJs (D) and recruitment rate constants (E) in cells grown on gelatin or N-cad-BioS after treatment with vehicle (DMSO) or 50  $\mu\text{M}$  ITX3;  $n = 7$  junctions per group from three independent experiments. **\*\*\***,  $P < 0.001$ , ANOVA with Tukey's post hoc test. **(F and G)** Rates of VE-cadherin internalization from AJs (F) and internalization rate constants (G) in cells grown on gelatin or N-cad-BioS after treatment with vehicle (DMSO) or 50  $\mu\text{M}$  ITX3;  $n = 7$  junctions per group from three independent experiments. ns, ANOVA with Tukey's post hoc test. **(H)** Time-lapse images of VE-cadherin–Dendra2 in cells coexpressing either CFP-tagged PA-Rac1 or LI-Rac1 before and after photo-conversion of Dendra2 at  $t = 0$  within the irradiation zone (indicated by area between dashed lines on insets) in HPAECs grown on N-cad-BioS after treatment with vehicle (DMSO) or 50  $\mu\text{M}$  ITX3. Dashed lines outline the cell borders in grayscale images. Bar, 5  $\mu\text{m}$ ; insets, 2  $\mu\text{m}$ . PA-Rac1 was activated with  $\lambda = 458$  nm within the photo-conversion zone. Bars, 5  $\mu\text{m}$ ; insets, 2  $\mu\text{m}$ . **(I and J)** The rates of VE-cadherin recruitment to AJs (I) and recruitment rate constants (J) in cells grown on N-cad-BioS after treatment with vehicle (DMSO) or 50  $\mu\text{M}$  ITX3, and after activation of PA-Rac1 or LI-Rac1;  $n = 7$  junctions per group from three independent experiments. **\*\***,  $P < 0.01$ , ANOVA with Tukey's post hoc test. PA-Rac1 rescues VE-cadherin recruitment rate in cells treated with ITX3. (B, D, E–G, I, and J) Data are shown as mean  $\pm$  SD.

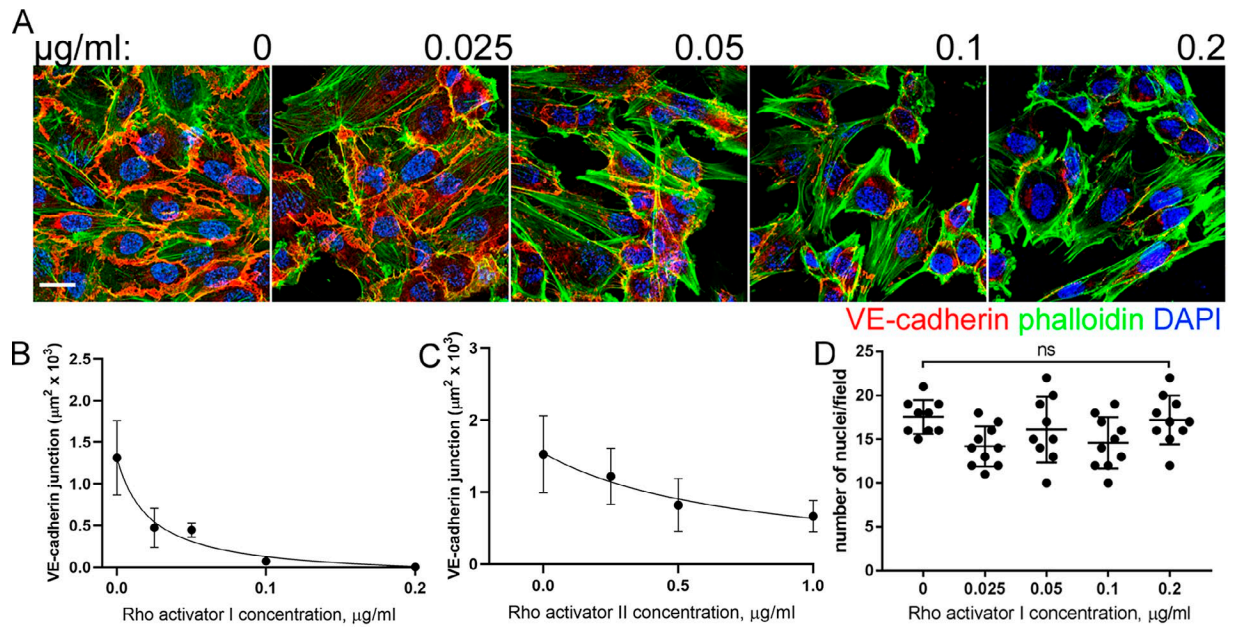

Figure S7. **Activation of RhoA and increased intracellular tension are not sufficient to induce assembly of VE-cadherin junctions.** (A) Confocal images of HPAECs grown on gelatin and stained for VE-cadherin (red), F-actin (phalloidin, green), and DAPI. Cells were treated with indicated doses of Rho activator I. Bar, 10 µm. We observed formation of actin stress-fibers and destabilization of VE-cadherin junctions with increased concentration of Rho activator I. (B and C) Quantification of VE-cadherin area from images in A for different doses of Rho activator I (B) and Rho activator II (C). *n* = 8–10 fields of view from two independent experiments. (D) Quantification of number of nuclei per field for images in A. Number of nuclei per field did not change with increasing concentrations of Rho activator I. *n* = 8–10 fields of view from two independent experiments. ns, ANOVA with Tukey’s post hoc test. (B–D) Data are shown as mean ± SD.

Table S4. All information regarding reagents and tools used in the paper

| Reagent or resource                                              | Source                                 | Identifier  |
|------------------------------------------------------------------|----------------------------------------|-------------|
| Antibodies                                                       |                                        |             |
| Goat polyclonal anti-VE-cadherin                                 | Santa Cruz                             | sc-6458     |
| Rabbit polyclonal anti-VE-cadherin                               | Cell Signaling Technology              | #2158       |
| Rat monoclonal anti-VE-cadherin                                  | BD Biosciences                         | 555289      |
| Rabbit polyclonal anti-N-cadherin                                | Santa Cruz                             | sc-7939     |
| Rabbit polyclonal anti-N-cadherin                                | Abcam                                  | ab12221     |
| Mouse monoclonal anti-N-cadherin                                 | ECM Biosciences                        | CM-1701     |
| Rabbit polyclonal anti-N-cadherin                                | Abcam                                  | ab76057     |
| Rabbit polyclonal anti-Desmin                                    | Abcam                                  | ab15200     |
| Rat polyclonal anti-CD31                                         | BD Bioscience                          | #550274     |
| Rabbit polyclonal anti-CD31                                      | Abcam                                  | ab28364     |
| Rabbit polyclonal anti-CD31                                      | Santa Cruz                             | sc-1506-R   |
| Rabbit polyclonal anti-Laminin                                   | Abcam                                  | ab11575     |
| Rabbit polyclonal anti-Fibrinogen                                | Dako                                   | A0080       |
| Mouse monoclonal anti- $\beta$ -actin                            | Proteintech                            | 60008-1-Ig  |
| Mouse monoclonal anti- $\beta$ -actin - Peroxidase               | Sigma-Aldrich                          | A3854       |
| Alexa Fluor 488 Phalloidin                                       | Invitrogen                             | A12379      |
| Mouse monoclonal anti- $\beta$ -tubulin                          | Sigma-Aldrich                          | T8328       |
| Goat polyclonal anti-PDGFR $\beta$ Antibody                      | R & D Systems, Inc.                    | AF1042      |
| Rabbit polyclonal anti Trio antibody                             | Bethyl Laboratories                    | A304-269A-T |
| Rabbit polyclonal anti Trio lantibody                            | Santa Cruz                             | sc-28564    |
| Rabbit polyclonal Phospho-Myosin Light Chain 2 (Ser 19) antibody | Cell Signaling Technology              | #3671       |
| Bacterial and Virus Strains                                      |                                        |             |
| VE-cadherin-Dendra2 adenovirus                                   | <a href="#">Daneshjou et al., 2015</a> | NA          |
| MAX Efficiency DH5 $\alpha$ Competent Cells                      | Thermo Fisher Scientific               | 18258012    |
| One Shot™ BL21(DE3) Chemically Competent <i>E. coli</i>          | Thermo Fisher Scientific               | C600003     |
| Chemicals, Peptides, and Recombinant Proteins                    |                                        |             |
| Recombinant human N-cadherin-His                                 | Sino Biological                        | 11039-H08H  |
| Recombinant human N-cadherin-Fc-His                              | Sino Biological                        | 11039-H03H  |
| EDC                                                              | Thermo Fisher Scientific               | 22980       |
| EDTA                                                             | Research Products International        | E57020      |
| Imidazole                                                        | Sigma-Aldrich                          | I5513       |
| N-Hydroxysuccinimide                                             | Sigma-Aldrich                          | 130672      |
| Glymo                                                            | Sigma-Alrich                           | 440167      |
| AB-NTA (free acid)                                               | Dojindo                                | A459-10     |
| 10 kD Dextran, Alexa Fluor 555                                   | Sigma-Aldrich                          | D34679      |
| 70 kD Dextran, Oregon Green 488                                  | Sigma-Aldrich                          | D7173       |
| NiCl <sub>2</sub>                                                | Thermo Fisher Scientific               | N53-500     |
| DSP (dithiobis(succinimidyl propionate))                         | Thermo Fisher Scientific               | 22585       |
| DL-Dithiotreitol                                                 | Sigma-Aldrich                          | D0632       |
| 4 $\times$ Laemmli buffer                                        | BioRad                                 | 1610747     |
| RIPA                                                             | Sigma-Aldrich                          | R0278       |
| ITX3                                                             | Millipore                              | 645890      |
| HisPur Ni-NTA Magnetic Beads                                     | Thermo Fisher Scientific               | 88831       |



Table S4. All information regarding reagents and tools used in the paper (Continued)

| Reagent or resource                                                                      | Source                               | Identifier                                                |
|------------------------------------------------------------------------------------------|--------------------------------------|-----------------------------------------------------------|
| Fibronectin                                                                              | Sigma-Aldrich                        | F1141                                                     |
| Fibronectin                                                                              | Sigma-Aldrich                        | F0895                                                     |
| Laminin                                                                                  | Sigma-Aldrich                        | L2020                                                     |
| Collagen type 1                                                                          | Sigma-Aldrich                        | C8919                                                     |
| Glass cover slips                                                                        | Schott Nexterion                     | 1472309                                                   |
| <sup>125</sup> I radiolabeled human serum albumin, 10 uCi/ml                             | Anazao Health                        | I-125 HSA                                                 |
| Vectashield                                                                              | Vector Laboratories, Inc.            | H-1000                                                    |
| Prolong Gold Antifade                                                                    | Thermo Fisher Scientific             | P36930                                                    |
| Fluoromount                                                                              | Southern Biotech                     | 0100-01                                                   |
| Rho Kinase Inhibitor III, Rockout                                                        | Santa Cruz                           | sc-203237                                                 |
| Rho Activator I                                                                          | Cell Signaling                       | CN01-A                                                    |
| Rho Activator II                                                                         | Cell Signaling                       | CN03-A                                                    |
| BSA, Alexa Fluor 647 conjugate                                                           | Thermo Fisher Scientific             | A34785                                                    |
| Critical Commercial Assays                                                               |                                      |                                                           |
| Basic Endothelial Cells Nucleofector Kit                                                 | Lonza                                | VPI-1001                                                  |
| GeneSilencer Transfection Reagent                                                        | Genlantis                            | T500020                                                   |
| Lipofectamine 2000 Transfection Reagent                                                  | Thermo Fisher Scientific             | 11668019                                                  |
| RhoA G17A Agarose Beads                                                                  | Abcam                                | Ab211183                                                  |
| Experimental Models: Cell Lines                                                          |                                      |                                                           |
| Human Pulmonary Aortic Endothelial cells                                                 | Lonza                                | CC-2530                                                   |
| Experimental Models: Organisms/Strains                                                   |                                      |                                                           |
| N-cadherin-flox/flox                                                                     | Jackson                              | B6.129S6(SJL)-Cdh2tm1Glr/J                                |
| end-SCL-CreERT <sup>2</sup>                                                              | <a href="#">Göthert et al., 2004</a> | Available from Jackson, Tg(Tal1-cre/ERT)42-056Jrg         |
| PDGFRb-P2A-CreERT <sup>2</sup>                                                           | <a href="#">Cuervo et al., 2017</a>  | Available from Jackson, B6.Cg-Pdgfrbtm1.1(cre/ERT2)Csln/J |
| N-cadherin-flox/flox- SCL-CreERT2                                                        | This paper                           | NA                                                        |
| N-cadherin-flox/flox- PDGFRb-P2A-CreERT2                                                 | This paper                           | NA                                                        |
| Oligonucleotides                                                                         |                                      |                                                           |
| <i>Cdh2</i> ON-TARGETplus siRNA Target Sequence: GUGCAACAGUAUACGUUAA                     | Dharmacon                            | J-011605-06                                               |
| <i>Cdh2</i> ON-TARGETplus siRNA Target Sequence: GGACCCAGAU CGAUUAUUG                    | Dharmacon                            | J-011605-07                                               |
| <i>Cdh2</i> ON-TARGETplus siRNA Target Sequence: CAUAGUAGCUAAUUAACU                      | Dharmacon                            | J-011605-08                                               |
| <i>Cdh2</i> ON-TARGETplus siRNA Target Sequence: GACAGCCUCUUCUCAUUGU                     | Dharmacon                            | J-011605-09                                               |
| <i>TRIO</i> ON-TARGETplus siRNA Target Sequence: GUAAAGAAGUGAAAGAUUC                     | Dharmacon                            | J-005047-05                                               |
| <i>TRIO</i> ON-TARGETplus siRNA Target Sequence: CGACCUAUCCGUAGCAUUA                     | Dharmacon                            | J-005047-06                                               |
| <i>TRIO</i> ON-TARGETplus siRNA Target Sequence: GGAAUACAACCACGAAGAA                     | Dharmacon                            | J-005047-07                                               |
| <i>TRIO</i> ON-TARGETplus siRNA Target Sequence: AGAACAGGUUUGCAUUA                       | Dharmacon                            | J-005047-08                                               |
| <i>SMARTpool</i> : ON-TARGETplus <i>CDH5</i> siRNA:Combination of four Target Sequences: | Dharmacon                            | L-003641-00-0005                                          |
| GGACAUACACCACGAAAC                                                                       |                                      | J-003641-06                                               |
| GAGCCCAGGUCAUUAUCAA                                                                      |                                      | J-003641-07                                               |
| CGAUAAUUCUGGACGUUU                                                                       |                                      | J-003641-08                                               |
| UGACGUGGAUUACGACUUC                                                                      |                                      | J-003641-09                                               |
| Recombinant DNA                                                                          |                                      |                                                           |
| pTriEx-mCerulean-PA-Rac1                                                                 | <a href="#">Wu et al., 2009</a>      | Addgene: 22030                                            |
| pTriEx-PA-Rac1-C450A                                                                     | <a href="#">Wu et al., 2009</a>      | Addgene: 22025                                            |

Table S4. All information regarding reagents and tools used in the paper (Continued)

| Reagent or resource               | Source                                  | Identifier                                                                                                                                                                  |
|-----------------------------------|-----------------------------------------|-----------------------------------------------------------------------------------------------------------------------------------------------------------------------------|
| peGFP[C1] Trio-FL                 | van Rijssel et al., 2012                | N/A                                                                                                                                                                         |
| peGFP[C1] Trio-N                  | van Rijssel et al., 2012                | N/A                                                                                                                                                                         |
| peGFP[C1] Trio-C                  | van Rijssel et al., 2012                | N/A                                                                                                                                                                         |
| pTriEx-Rac1 FLARE.dc Biosensor WT | MacNevin et al., 2016                   | N/A                                                                                                                                                                         |
| pTriEx-RhoA FLARE.sc Biosensor WT | Pertz et al., 2006                      | Addgene: 12150                                                                                                                                                              |
| GFP-Trio-D1d                      | Cannet et al., 2014                     | N/A                                                                                                                                                                         |
| GFP-Trio-D2d                      | Cannet et al., 2014                     | N/A                                                                                                                                                                         |
| pGEX-4T1-Rac1 G15A                | García-Mata et al., 2006                | N/A                                                                                                                                                                         |
| Software and Algorithms           |                                         |                                                                                                                                                                             |
| ImageJ (Fiji)                     | National Institutes of Health           | <a href="https://fiji.sc/">https://fiji.sc/</a>                                                                                                                             |
| Metamorph                         | Olympus                                 | <a href="https://www.olympus-lifescience.com/en/software/metamorph/">https://www.olympus-lifescience.com/en/software/metamorph/</a>                                         |
| Zen                               | Carl Zeiss                              | <a href="https://www.zeiss.com/microscopy/us/products/microscope-software/zen-lite.html">https://www.zeiss.com/microscopy/us/products/microscope-software/zen-lite.html</a> |
| Prism 7                           | GraphPad                                | <a href="https://www.graphpad.com/scientific-software/prism/">https://www.graphpad.com/scientific-software/prism/</a>                                                       |
| Photoshop CS6                     | Adobe                                   | <a href="http://www.adobe.com/products/photoshop.html">http://www.adobe.com/products/photoshop.html</a>                                                                     |
| R                                 | The R Project for Statistical Computing | <a href="https://www.r-project.org/">https://www.r-project.org/</a>                                                                                                         |

Provided online are three tables. Table S1 shows a summary by gene names for peptides identified in N-cadherin MS experiment after removing non-unique peptides. Only proteins with greater than three unique peptides and mean peptide intensities (log<sub>10</sub>) greater than six were included. Table S2 shows proteins detected in N-cadherin MS (from Table S1), the log<sub>10</sub> mean intensity score, and the spectral counts were used to create GO clusters based on known interactions. GO terms were obtained from BioMart, and associations were computed using the hypergeometric test ( $n > 5$ ) for each of the nine clusters containing the proteins of interest. Table S3 shows previously known protein interaction scores summarized by gene names (based on HIPPIE dataset; see Materials and methods). For each gene of interest selected, the protein interaction score (0–1) was calculated. Protein interactions were filtered to include only those with confidence scores greater than 0.2.

## References

- Cannet, A., S. Schmidt, B. Delaval, and A. Debant. 2014. Identification of a mitotic Rac-GEF, Trio, that counteracts MgcRacGAP function during cytokinesis. *Mol. Biol. Cell.* 25:4063–4071. <https://doi.org/10.1091/mbc.e14-06-1153>
- Cuervo, H., B. Pereira, T. Nadeem, M. Lin, F. Lee, J. Kitajewski, and C.S. Lin. 2017. PDGFR $\beta$ -P2A-CreER<sup>T2</sup> mice: a genetic tool to target pericytes in angiogenesis. *Angiogenesis.* 20:655–662. <https://doi.org/10.1007/s10456-017-9570-9>
- Daneshjou, N., N. Sieracki, G.P. van Nieuw Amerongen, D.E. Conway, M.A. Schwartz, Y.A. Komarova, and A.B. Malik. 2015. Rac1 functions as a reversible tension modulator to stabilize VE-cadherin trans-interaction. *J. Cell Biol.* 208:23–32. <https://doi.org/10.1083/jcb.201409108>
- García-Mata, R., K. Wennerberg, W.T. Arthur, N.K. Noren, S.M. Ellerbroek, and K. Burridge. 2006. Analysis of activated GAPs and GEFs in cell lysates. *Methods Enzymol.* 406:425–437. [https://doi.org/10.1016/S0076-6879\(06\)06031-9](https://doi.org/10.1016/S0076-6879(06)06031-9)
- Göthert, J.R., S.E. Gustin, J.A. van Eekelen, U. Schmidt, M.A. Hall, S.M. Jane, A.R. Green, B. Göttgens, D.J. Izon, and C.G. Begley. 2004. Genetically tagging endothelial cells in vivo: bone marrow-derived cells do not contribute to tumor endothelium. *Blood.* 104:1769–1777. <https://doi.org/10.1182/blood-2003-11-3952>
- MacNevin, C.J., A. Touthkine, D.J. Marston, C.W. Hsu, D. Tsygankov, L. Li, B. Liu, T. Qi, D.V. Nguyen, and K.M. Hahn. 2016. Ratiometric Imaging Using a Single Dye Enables Simultaneous Visualization of Rac1 and Cdc42 Activation. *J. Am. Chem. Soc.* 138:2571–2575. <https://doi.org/10.1021/jacs.5b09764>
- Pertz, O., L. Hodgson, R.L. Klemke, and K.M. Hahn. 2006. Spatiotemporal dynamics of RhoA activity in migrating cells. *Nature.* 440:1069–1072. <https://doi.org/10.1038/nature04665>
- van Rijssel, J., J. Kroon, M. Hoogenboezem, F.P. van Alphen, R.J. de Jong, E. Kostadinova, D. Geerts, P.L. Hordijk, and J.D. van Buul. 2012. The Rho-guanine nucleotide exchange factor Trio controls leukocyte transendothelial migration by promoting docking structure formation. *Mol. Biol. Cell.* 23:2831–2844. <https://doi.org/10.1091/mbc.e11-11-0907>
- Wu, Y.I., D. Frey, O.I. Lungu, A. Jaehrig, I. Schlichting, B. Kuhlman, and K.M. Hahn. 2009. A genetically encoded photoactivatable Rac controls the motility of living cells. *Nature.* 461:104–108. <https://doi.org/10.1038/nature08241>
